# Supplementary material
Source: PubMed Central journal article supplement (PMC3217339)

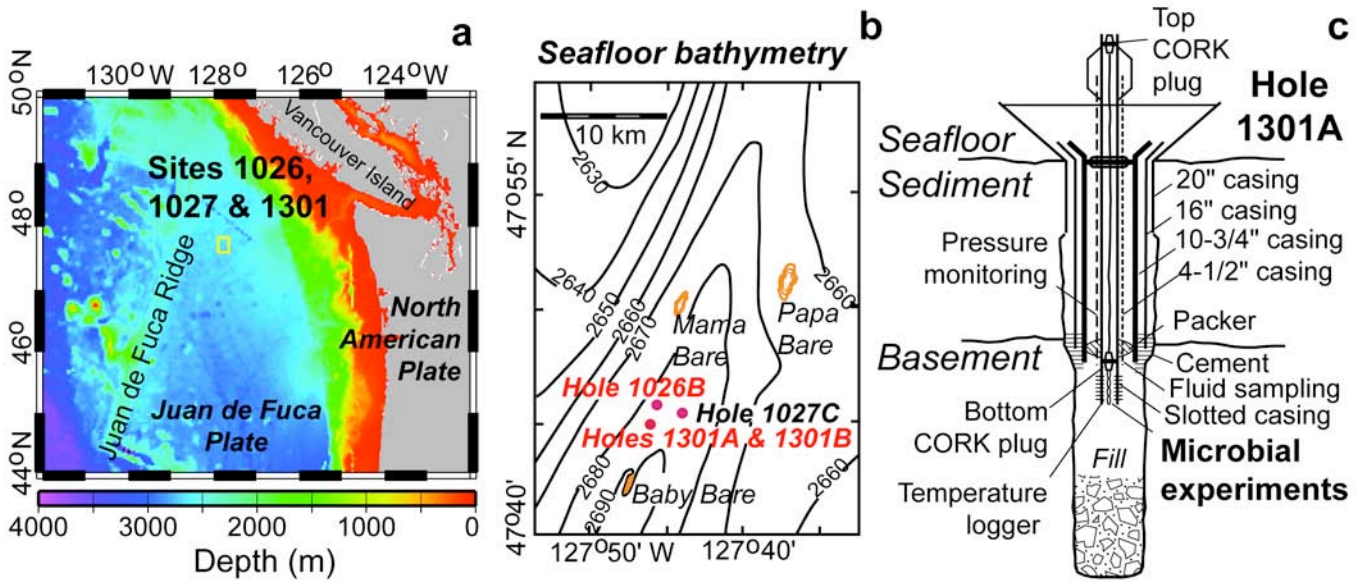

Supplemental Figure 1

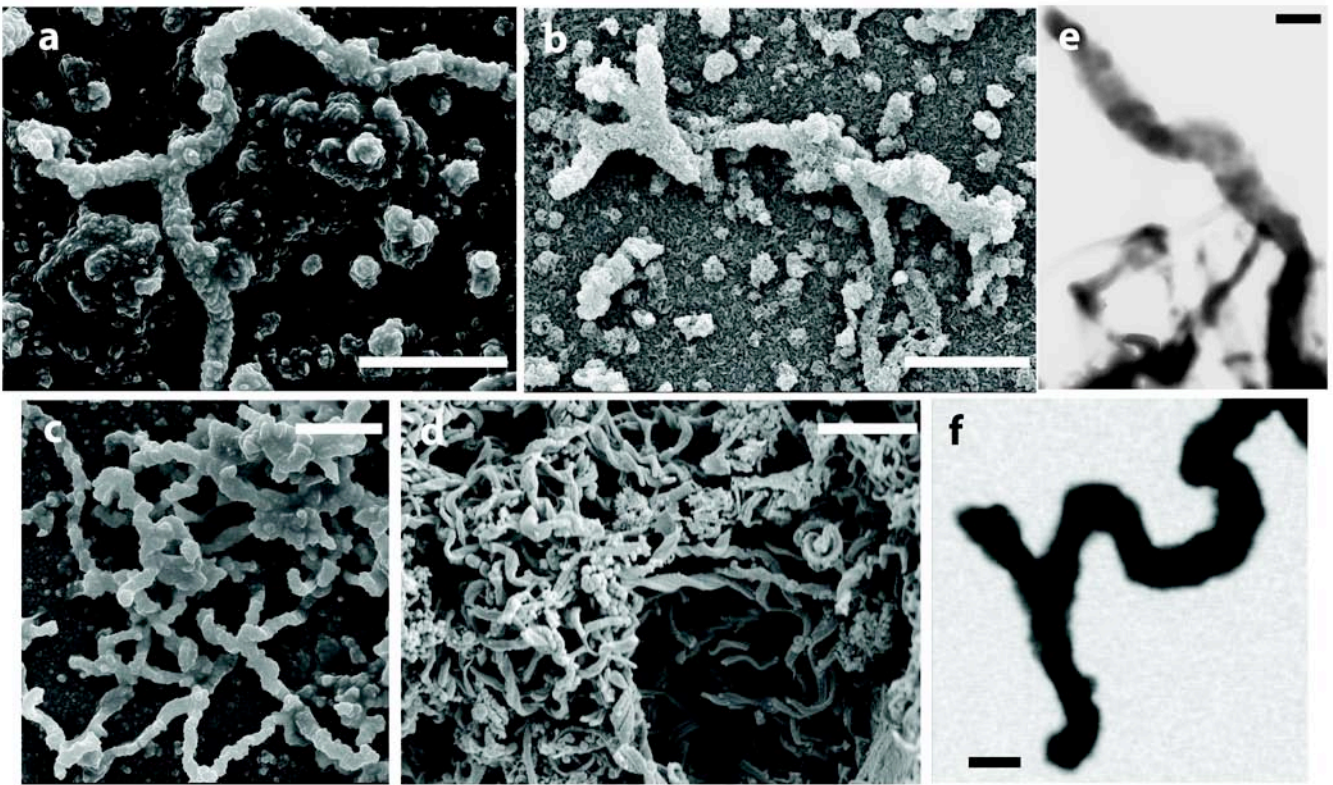

Supplemental Figure 2



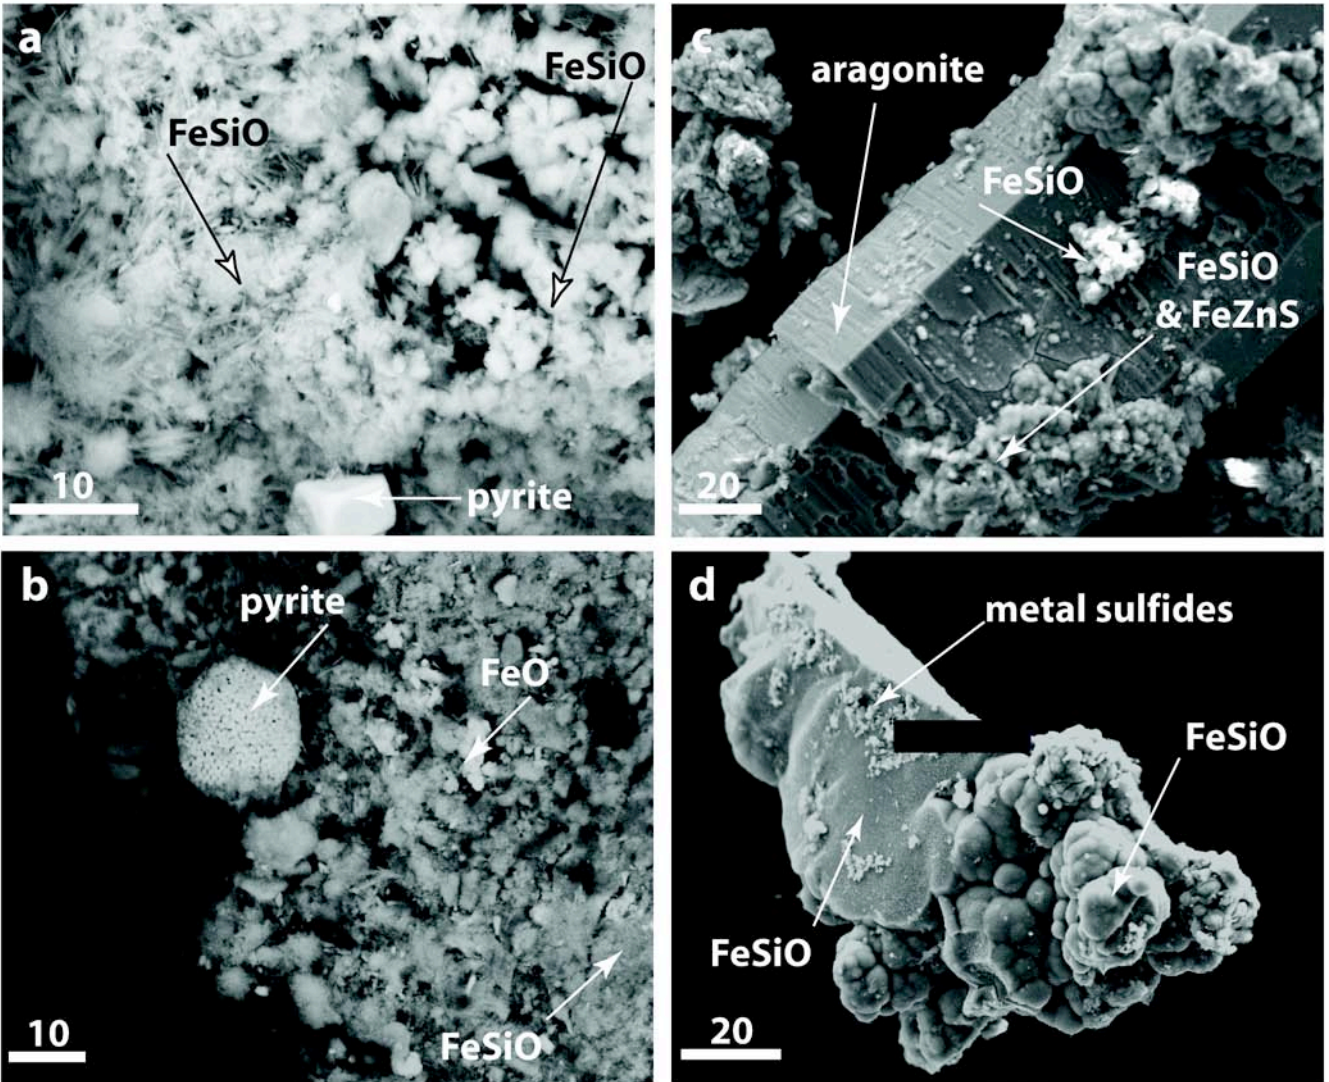

Supplemental Figure 3

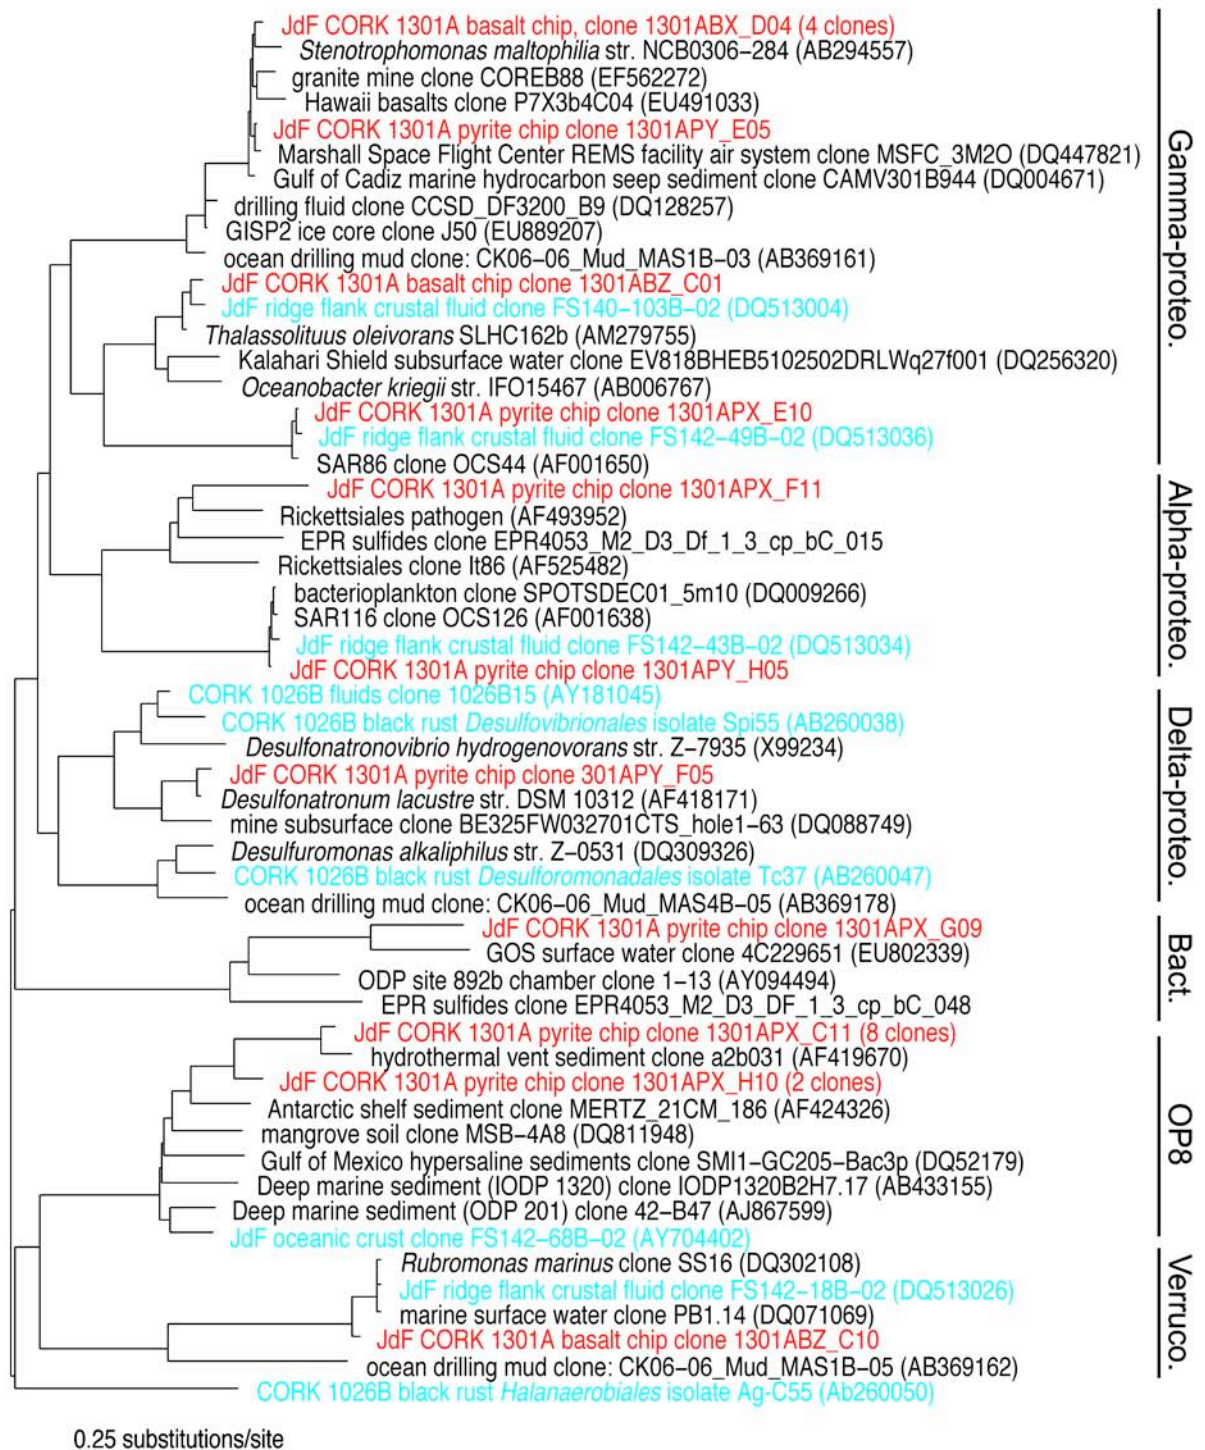

Supplemental Figure 4

Supplement: ismej2010157x1.pdf [file ismej2010157x1.pdf]
